# Supplementary material
Source: publisher figshare collection journal article supplement (https://geolsoc.figshare.com/ndownloader/files/22448486)
Supplement: Supplementary file 1 [file 22448486]

## Sheet: Sheet1
Supplementary Table 4
Lu–Hf isotope compositions of zircon grains of granitoids from Saraikela-Hata area, Singhbhum Craton
spot no		176Hf/177Hf		1σ		176Lu/177Hf		1σ		176Yb/177Hf		1σ		176Hf/177Hf(t)		1σ		εHf(t)		1σ		TDM1 (Ma)		TDM2 (Ma)
Saraikela gneiss (SBG28), T = 3316 ± 100 Ma																									176Hf/177Hf (3416 Ma)	1σ	εHf (3416 Ma)	1σ
SBG28-02		0.280722		1.25986e-05		0.000310067		4.79173e-06		0.00972038		0.000212352		0.280702		1.26174e-05		2.23225		2.67121		3419.64		3450.66	0.280701	1.26177e-05	4.59166	2.67887
SBG28-04		0.280723		1.21373e-05		0.000682953		3.06258e-05		0.0183968		0.000795312		0.28068		1.23685e-05		1.44596		2.66953		3449.32		3487.58	0.280678	1.23785e-05	3.77876	2.67724
SBG28-05		0.280715		2.0627e-05		0.000444677		4.07585e-06		0.0136744		0.000123686		0.280687		2.06476e-05		1.6974		2.73383		3439.39		3475.77	0.280686	2.06477e-05	4.04714	2.74134
SBG28-08		0.280743		1.79654e-05		0.000641648		6.69597e-06		0.0188534		0.000193122		0.280702		1.80157e-05		2.23888		2.71023		3420.28		3450.35	0.280701	1.80162e-05	4.57479	2.7178
SBG28-09		0.28073		1.68373e-05		0.000562249		4.79333e-06		0.0160495		0.000171148		0.280694		1.68771e-05		1.95447		2.70084		3430.42		3463.71	0.280693	1.68774e-05	4.29594	2.70842
SBG28-10		0.280723		1.7661e-05		0.000535603		8.7639e-06		0.0174613		0.00026031		0.280689		1.77019e-05		1.77801		2.70749		3436.75		3471.99	0.280688	1.77026e-05	4.12133	2.71506
SBG28-11		0.280702		1.3803e-05		0.00020629		1.01804e-05		0.00773944		0.000369558		0.280689		1.38243e-05		1.76482		2.67867		3436.21		3472.61	0.280688	1.38253e-05	4.13147	2.68631
SBG28-12		0.280716		1.19982e-05		0.000582342		3.38615e-06		0.0178188		9.85954e-05		0.280679		1.20558e-05		1.42312		2.66771		3449.8		3488.65	0.280678	1.20561e-05	3.76304	2.67537
SBG28-14		0.280708		1.32074e-05		0.000192583		4.12398e-06		0.00670428		0.000142548		0.280696		1.32156e-05		2.03288		2.67483		3426.51		3460.03	0.280696	1.32158e-05	4.40056	2.68248
Rajnagar leucogranite (SBG74), T = 3316 ± 32 Ma
SBG74-02		0.28077		1.15766e-05		0.00106606		5.73422e-05		0.0295873		0.00147894		0.280701		1.2161e-05		2.22279		1.42922		3422.03		3451.11
SBG74-03		0.28081		1.4717e-05		0.00108436		2.82021e-05		0.0323867		0.00102758		0.28074		1.48428e-05		3.60682		1.46121		3371.03		3386.08
SBG74-04		0.280765		1.27546e-05		0.000829878		3.47887e-05		0.0240516		0.00121622		0.280712		1.29574e-05		2.58607		1.43813		3408.08		3434.05
SBG74-05		0.280875		1.33951e-05		0.00159899		7.87076e-06		0.0559276		0.000208206		0.280773		1.3443e-05		4.77215		1.44406		3328.17		3331.29
SBG74-06		0.280798		1.26153e-05		0.000738463		6.06541e-06		0.0222098		0.00025584		0.280751		1.263e-05		3.99517		1.43461		3356.33		3367.83
SBG74-07		0.280816		1.69605e-05		0.00133703		1.55327e-05		0.0394414		0.000482728		0.28073		1.70107e-05		3.25366		1.49087		3384.51		3402.68
SBG74-08		0.280756		1.39604e-05		0.000710285		1.95001e-05		0.0201019		0.000648527		0.28071		1.40231e-05		2.54283		1.45076		3409.37		3436.08
SBG74-10		0.280813		1.6568e-05		0.00112508		5.11701e-05		0.0353415		0.00175718		0.280742		1.69023e-05		3.65279		1.48935		3369.39		3383.92
SBG74-11		0.280875		1.67019e-05		0.00152938		4.02064e-05		0.0458618		0.00102494		0.280777		1.69261e-05		4.92958		1.48985		3322.26		3323.88
SBG74-12		0.280854		1.58503e-05		0.00124892		8.85243e-06		0.0385292		0.000241285		0.280775		1.58802e-05		4.83254		1.47515		3325.82		3328.45
SBG74-13		0.280786		1.62829e-05		0.000810191		9.92684e-06		0.0248811		0.000268019		0.280734		1.63034e-05		3.38364		1.48082		3378.82		3396.57
SBG74-14		0.280794		1.1581e-05		0.000837318		8.71142e-06		0.0263915		0.000360337		0.28074		1.16065e-05		3.61149		1.42354		3370.51		3385.87
SBG74-15		0.280889		1.59117e-05		0.00182394		5.37165e-05		0.0575491		0.00132692		0.280773		1.63186e-05		4.7708		1.4812		3328.29		3331.35
SBG74-16		0.280867		1.35098e-05		0.00150982		1.40256e-05		0.0503062		0.000916504		0.280771		1.35734e-05		4.69882		1.44559		3330.88		3334.74
Hata leucogranite (SBG55), T = 3261 ± 28 Ma
SBG55-02		0.280757		1.33614e-05		0.000729343		2.48746e-05		0.0207725		0.000791613		0.280711		1.34584e-05		1.25744		1.39295		3409.65		3452.07
SBG55-04		0.280745		1.37015e-05		0.000640954		1.86756e-05		0.0185389		0.000710726		0.280705		1.37562e-05		1.026		1.39661		3417.75		3462.94
SBG55-07		0.280764		1.48732e-05		0.000968047		1.10906e-05		0.0296609		0.000415024		0.280703		1.48992e-05		0.986668		1.41141		3420.53		3464.79
SBG55-08		0.280744		1.18831e-05		0.000568242		1.02347e-05		0.0159094		0.000374323		0.280708		1.19047e-05		1.1505		1.37487		3412.92		3457.1
SBG55-09		0.280794		1.65203e-05		0.00113712		1.14784e-05		0.0325715		0.000576495		0.280723		1.65481e-05		1.67619		1.43462		3395.76		3432.4
SBG55-10		0.28081		1.35959e-05		0.00139516		5.42182e-05		0.0423605		0.00154001		0.280722		1.40369e-05		1.64638		1.40023		3397.79		3433.8
SBG55-12		0.280726		1.03767e-05		0.000481375		9.95633e-06		0.0130232		0.000207956		0.280695		1.0399e-05		0.695477		1.35922		3429.1		3478.47
SBG55-13		0.280728		1.47709e-05		0.000708395		2.39043e-05		0.0194169		0.000690643		0.280684		1.48522e-05		0.288414		1.4107		3444.95		3497.58
SBG55-14		0.280751		1.24279e-05		0.00084359		5.21341e-06		0.0251808		0.000152908		0.280698		1.2441e-05		0.802123		1.38084		3426.77		3473.46
SBG55-15		0.280801		1.98381e-05		0.0013017		5.45271e-05		0.038581		0.00169113		0.28072		2.01442e-05		1.5661		1.49185		3400.43		3437.57
Gitilata leucogranite (SBG77), T = 3261 ± 28 Ma
SBG77-02		0.280771		1.61721e-05		0.00104025		1.07576e-05		0.0330081		0.00023315		0.280706		1.61995e-05		0.729641		1.47526		3417.58		3464.77
SBG77-03		0.280816		1.74651e-05		0.00125837		7.70745e-06		0.0415513		0.000422399		0.280738		1.749e-05		1.85435		1.49398		3376.88		3411.92
SBG77-04		0.28078		1.48039e-05		0.00111361		9.37407e-06		0.0356236		0.000326851		0.28071		1.48323e-05		0.868902		1.45691		3412.77		3458.23
SBG77-05		0.280765		1.37278e-05		0.0010426		1.05438e-05		0.0339327		0.000322484		0.2807		1.37595e-05		0.516491		1.44344		3425.44		3474.78
SBG77-06		0.280742		1.41188e-05		0.000744088		5.94821e-06		0.0237514		0.000313714		0.280696		1.41316e-05		0.349089		1.44798		3430.17		3482.64
SBG77-07		0.28076		1.31351e-05		0.000970268		1.14169e-05		0.0322289		0.000323522		0.2807		1.31689e-05		0.499111		1.43643		3425.74		3475.6
SBG77-08		0.280777		1.60603e-05		0.00117858		1.1167e-05		0.0374425		0.000362869		0.280704		1.60929e-05		0.637531		1.47377		3421.6		3469.09
SBG77-09		0.280781		1.56442e-05		0.0010603		1.74433e-05		0.0315547		0.000562195		0.280715		1.56965e-05		1.02406		1.46838		3406.82		3450.94
SBG77-10		0.280763		1.22693e-05		0.000984277		1.19345e-05		0.0314988		0.000296015		0.280702		1.23078e-05		0.578111		1.42672		3422.9		3471.89
SBG77-11		0.280832		1.90314e-05		0.00182624		2.59217e-05		0.0597951		0.000739423		0.280718		1.91353e-05		1.15255		1.51928		3405.26		3444.9
SBG77-13		0.280759		1.8033e-05		0.00098646		7.34948e-06		0.0275961		0.000322676		0.280697		1.80497e-05		0.399318		1.50223		3429.49		3480.28
Note: 176Hf/177Hf (t) represents initial 176Hf/177Hf ratio of zircon. εHf(t) is calculated relative to a chondritic reservoir with a present–day 176Hf/177Hf ratio of 0.282785 and 176Lu/177Hf
ratio of 0.0336 (Bouvier et al., 2008). Present day 176Hf/177Hf ratio of 0.283294 and 176Lu/177Hf ratio of 0.03933 for depleted mantle (Blichert–Toft and Puchtel, 2010) and a mean
value of 176Lu/177Hf ratio of 0.0113 for the average crust (Rudnick and Gao, 2003) were used during calculation of TDM1 and TDM2. The 176Lu decay constant taken as 0.00001867 yr-1
(Söderlund et al., 2004). The Saraikela gneiss shows large uncertaininty in zircon U-Pb age (3316 ± 100 Ma). Therefore, εHf values are calculated both at 3316 Ma an 3416
Ma. The εHf value at 3216 Ma is not calculated because geological evidences (more deformed and metamorphsed nature compared to the adjacent 3.29 and 3.25 Ga Hata
and Gitilata leucogranites) indicate the the Saraikela gneiss is not that young.
References:
Blichert-Toft, J., Puchtel, I.S., 2010. Depleted mantle sources through time: evidence from Lu–Hf and Sm–Nd isotope systematics of Archean komatiites.
		Earth and Planetary Science Letters 297, 598–606.
Bouvier, A., Vervoort, J.D., Patchett, P.J., 2008. The Lu–Hf and Sm–Nd isotopic composition of CHUR: constraints from unequilibrated chondrites and
		implications for the bulk composition of terrestrial planets. Earth and Planetary Science Letters 273, 48–57.
Rudnick, R.L., Gao, S., 2003. Composition of the continental crust. In: Rudnick, R.L. (Ed.), Treatise on Geochemistry, vol. 3, The Crust. Elsevier, pp. 1–64.
Söderlund, U., Patchett, P.J., Vervoort, J.D., Isachsen, C.E., 2004. The 176Lu decay constant determined by Lu–Hf and U–Pb isotope
		systematics of Precambrian mafic intrusions. Earth and Planetary Science Letters 219, 311–324.
